# Supplementary material for: Modulating the Schottky barrier of MXenes/2D SiC contacts via functional groups and biaxial strain: a first-principles study
Source: Royal Society of Chemistry journal article supplement (doi:10.1039/d2cp02351b), 2022-01-01
Supplement: d2cp02351b1.pdf [file d2cp02351b1.pdf]

## Supporting Information

# Modulating Schottky Barrier of MXenes/2D SiC contacts via functional groups and biaxial strain: A First-Principles Study

Lingqin Huang<sup>\*a</sup>, Xuliang Deng<sup>\*a</sup>, Sumin Pan<sup>a</sup> and Wenwen Cui<sup>b</sup>

<sup>a</sup> School of Electrical Engineering and Automation, Jiangsu Normal University,  
Xuzhou 221116, China

<sup>b</sup> Laboratory of Quantum Materials Design and Application, School of Physics and  
Electronic Engineering, Jiangsu Normal University, Xuzhou 221116, China

Corresponding author: xldeng0993@163.com; lqhuang@jsnu.edu.cn

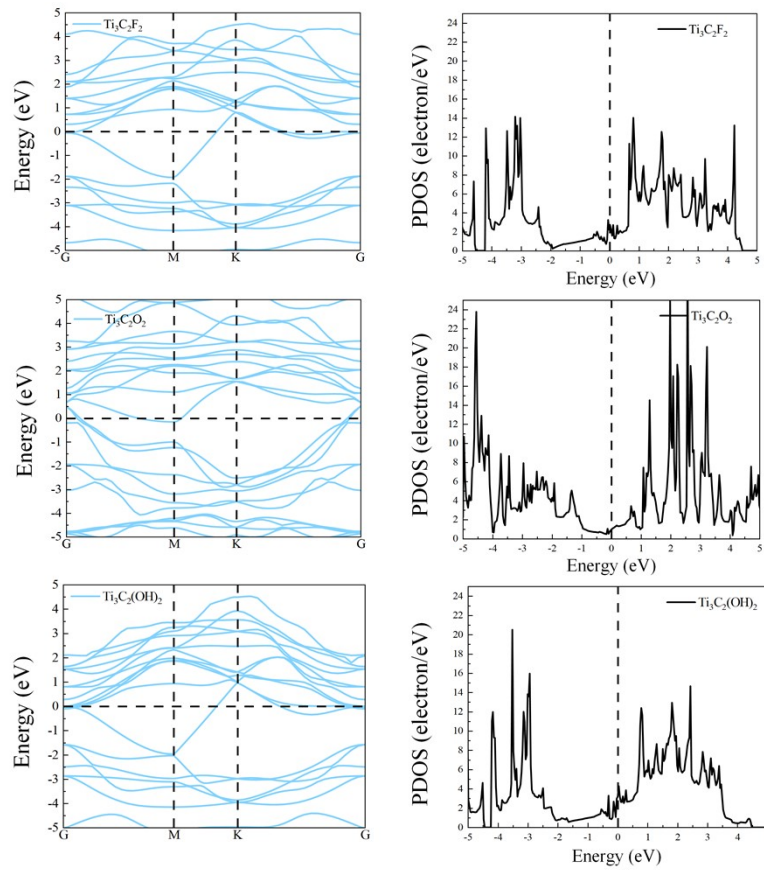

**Figure S1.** The band structures and PDOS of  $\text{Ti}_3\text{C}_2\text{T}_2$ . (The  $E_F$  is set to zero)

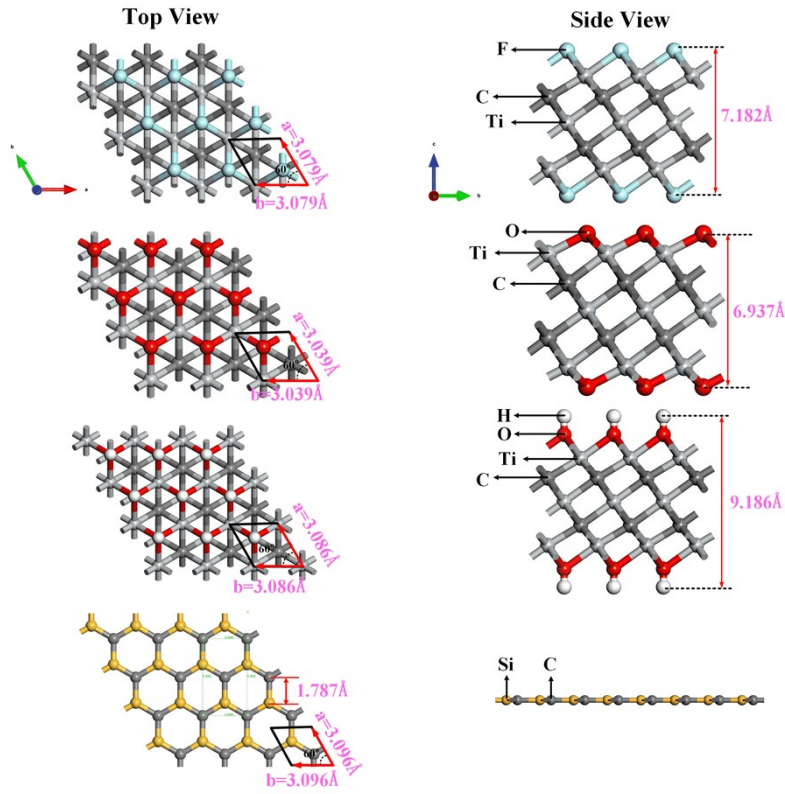

**Figure S2.** Top and Side views of crystal structures of  $\text{Ti}_3\text{C}_2\text{T}_2$  and SiC.

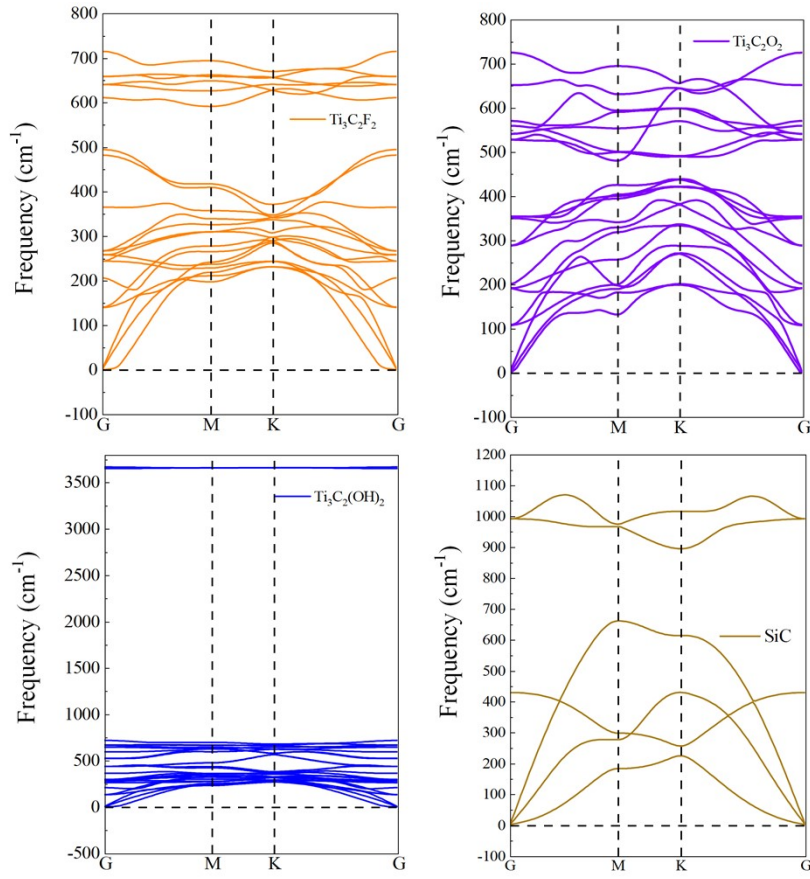

**Figure S3.** The phonon dispersion spectra of  $\text{Ti}_3\text{C}_2\text{T}_2$  and SiC.

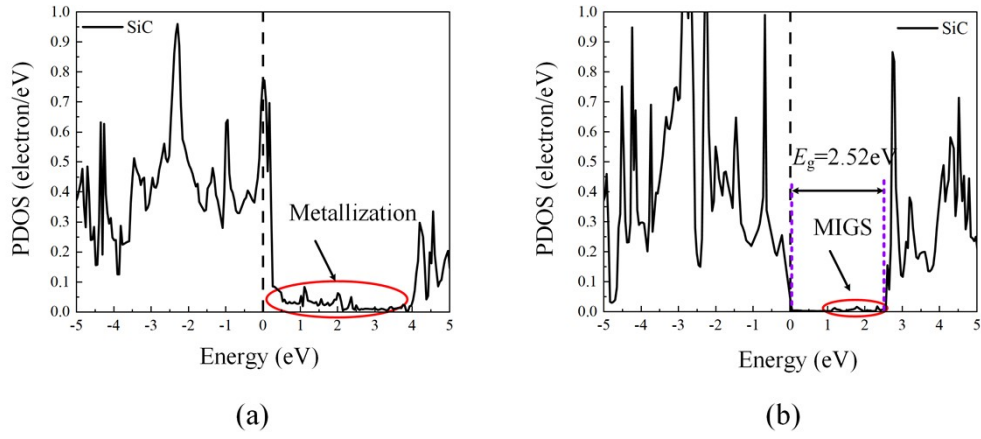

**Figure S4.** PDOS of SiC in (a)  $\text{Ti}_3\text{C}_2\text{O}_2/\text{SiC(A)}$  contact, (b)  $\text{Ti}_3\text{C}_2\text{O}_2/\text{SiC(B)}$  contact (The  $E_F$  is set to zero).

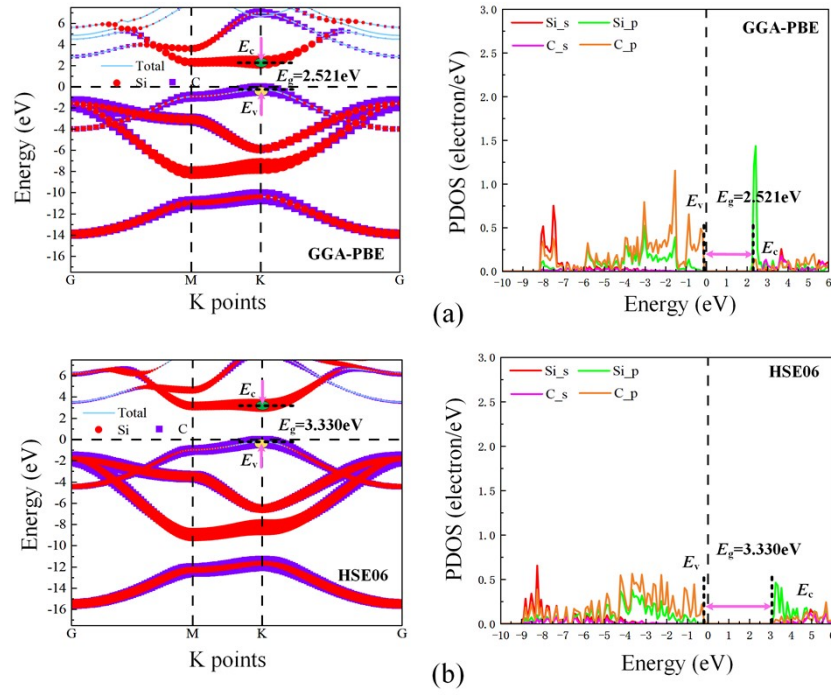

**Figure S5.** Band structures and PDOS of SiC calculated from (a) PBE and (b) HSE06 functional, respectively. (The  $E_F$  is set to zero).
